# Supplementary material for: Proanthocyanidins against Oxidative Stress: From Molecular Mechanisms to Clinical Applications
Source: PubMed Central journal article supplement (PMC5884402; doi:10.1155/2018/8584136), 2018-03-12
Supplement: 8584136.f1.pdf [file 8584136.f1.pdf]

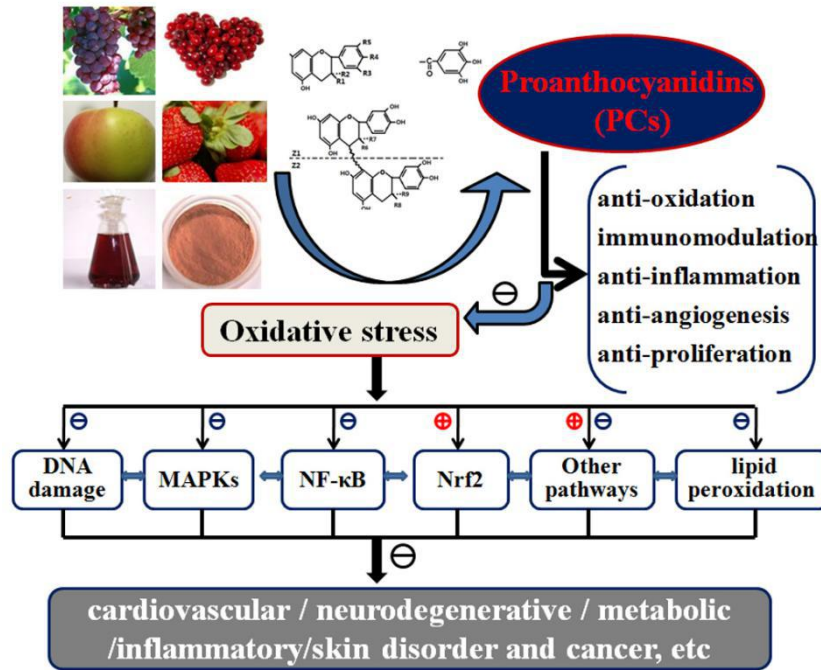

Graphical Abstract
